# Supplementary material for: The Nature and Nurture of HEXACO Personality Trait Differences
Source: Atypon-hosted journal article supplement (doi:10.1027/2151-2604/a000378), 2019-07-01
Supplement: 2151-2604_a000378_esm1.pdf [file 2151-2604_a000378_esm1.pdf]

Electronic Supplementary Material for  
Kandler, C., Richter, J. & Zapko-Willmes, A. (2019). The nature and nurture of HEXACO personality trait differences:  
An extended twin family study. *Zeitschrift für Psychologie*. <https://doi.org/10.1027/2151-2604/a000378>

**Table S1.** Intra-Class Correlations (*ICC*) and 95% Confidence Intervals (*CI*) for Specific Twin Family Dyads

| Family dyad                          | Genetic          |                | HEXACO personality traits |             |                 |              |             |                 |              |             |                 |               |             |                 |                   |             |                 |             |             |                 | Average<br><i>ICC</i> |
|--------------------------------------|------------------|----------------|---------------------------|-------------|-----------------|--------------|-------------|-----------------|--------------|-------------|-----------------|---------------|-------------|-----------------|-------------------|-------------|-----------------|-------------|-------------|-----------------|-----------------------|
|                                      | relation<br>in % | <i>n</i> dyads | Honesty-Humility          |             |                 | Emotionality |             |                 | Extraversion |             |                 | Agreeableness |             |                 | Conscientiousness |             |                 | Openness    |             |                 |                       |
|                                      |                  |                | <i>ICC</i>                | 95% CI      | <i>p</i>        | <i>ICC</i>   | 95% CI      | <i>p</i>        | <i>ICC</i>   | 95% CI      | <i>p</i>        | <i>ICC</i>    | 95% CI      | <i>p</i>        | <i>ICC</i>        | 95% CI      | <i>p</i>        | <i>ICC</i>  | 95% CI      | <i>p</i>        |                       |
| <b><i>MZ twin pair</i></b>           | 100              | 221            | <b>.455</b>               | .343, .554  | <b>&lt;.001</b> | <b>.599</b>  | .507, .677  | <b>&lt;.001</b> | <b>.559</b>  | .461, .643  | <b>&lt;.001</b> | <b>.462</b>   | .351, .560  | <b>&lt;.001</b> | <b>.521</b>       | .418, .611  | <b>&lt;.001</b> | <b>.658</b> | .576, .727  | <b>&lt;.001</b> | <b>.542</b>           |
| <i>DZ twin pair</i>                  | 50               | 352            | <b>.218</b>               | .116, .316  | <b>&lt;.001</b> | <b>.161</b>  | .056, .261  | <b>.001</b>     | <b>.263</b>  | .162, .358  | <b>&lt;.001</b> | <b>.155</b>   | .051, .256  | <b>.002</b>     | <b>.162</b>       | .058, .263  | <b>.001</b>     | <b>.278</b> | .178, .372  | <b>&lt;.001</b> | <b>.206</b>           |
| <i>Twins' mother &amp; twin a</i>    | 50               | 208            | .142                      | .007, .273  | .020            | .141         | .005, .272  | .021            | <b>.253</b>  | .121, .376  | <b>&lt;.001</b> | .055          | -.082, .189 | .216            | <b>.244</b>       | .112, .368  | <b>&lt;.001</b> | <b>.283</b> | .153, .403  | <b>&lt;.001</b> | <b>.186</b>           |
| <i>Twins' mother &amp; twin b</i>    | 50               | 208            | .157                      | .018, .290  | .013            | .094         | -.046, .230 | .093            | <b>.322</b>  | .192, .442  | <b>&lt;.001</b> | -.051         | -.188, .089 | .762            | .127              | -.013, .261 | .037            | <b>.255</b> | .120, .380  | <b>&lt;.001</b> | <b>.151</b>           |
| <i>Twins' father &amp; twin a</i>    | 50               | 119            | .174                      | -.005, .343 | .028            | .169         | -.010, .338 | .032            | .219         | .042, .383  | .008            | .089          | -.092, .264 | .168            | .016              | -.164, .194 | .433            | .160        | -.019, .330 | .040            | <b>.138</b>           |
| <i>Twins' father &amp; twin b</i>    | 50               | 119            | .135                      | -.049, .310 | .075            | .190         | .008, .361  | .021            | .248         | .068, .412  | .004            | .138          | -.046, .313 | .070            | .071              | -.114, .250 | .226            | <b>.263</b> | .085, .426  | <b>.002</b>     | <b>.174</b>           |
| Twin & offspring                     | 50               | 143            | .098                      | -.067, .258 | .121            | .160         | -.004, .315 | .028            | .185         | .022, .388  | .013            | .190          | .028, .342  | .011            | .137              | -.027, .294 | .050            | <b>.264</b> | .105, .409  | <b>.001</b>     | <b>.172</b>           |
| Twin's spouse & offspring            | 50               | 60             | .307                      | .061, .518  | .008            | -.046        | -.293, .208 | .637            | .174         | -.080, .408 | .089            | .023          | -.229, .273 | .429            | .280              | .032, .497  | .014            | .053        | -.200, .301 | .340            | <b>.132</b>           |
| MZ twin and cotwin's child           | 50               | 68             | .158                      | -.081, .380 | .096            | .329         | .101, .524  | .003            | .228         | -.008, .441 | .029            | -.003         | -.238, .234 | .508            | .195              | -.043, .412 | .053            | .207        | -.030, .423 | .043            | <b>.186</b>           |
| DZ twin and cotwin's child           | 25               | 72             | .002                      | -.228, .231 | .494            | .116         | -.116, .337 | .162            | -.138        | -.356, .095 | .878            | .086          | -.145, .308 | .233            | -.039             | -.266, .192 | .630            | .212        | -.018, .421 | .035            | <b>.040</b>           |
| Twins' mother & twin a's child       | 25               | 10             | .244                      | -.393, .734 | .224            | .405         | -.231, .807 | .098            | -.114        | -.652, .519 | .629            | -.128         | -.640, .478 | .654            | .442              | -.188, .822 | .078            | -.220       | -.711, .434 | .744            | <b>.105</b>           |
| Twins' mother & twin b's child       | 25               | 11             | .074                      | -.505, .619 | .403            | -.237        | -.702, .386 | .773            | .233         | -.374, .710 | .224            | .179          | -.421, .681 | .280            | -.245             | -.706, .379 | .780            | -.195       | -.679, .424 | .729            | <b>-.032</b>          |
| Twins' father & twin a's child       | 25               | 10             | -.152                     | -.674, .489 | .672            | .306         | -.335, .763 | .170            | -.109        | -.649, .522 | .624            | -.076         | -.630, .546 | .586            | -.128             | -.660, .508 | .645            | -.142       | -.668, .498 | .661            | <b>-.050</b>          |
| Twins' father & twin b's child       | 25               | 8              | .056                      | -.604, .691 | .434            | -.005        | -.641, .658 | .499            | -.032        | -.657, .643 | .527            | -.486         | -.858, .257 | .910            | .149              | -.540, .737 | .339            | -.302       | -.788, .449 | .787            | <b>-.103</b>          |
| MZ twins' offspring (cousins)        | 25               | 10             | .586                      | .007, .877  | .024            | -.418        | -.804, .239 | .902            | .383         | -.255, .798 | .112            | .109          | -.505, .663 | .367            | -.111             | -.650, .521 | .626            | -.322       | -.761, .340 | .836            | <b>.038</b>           |
| DZ twins' offspring (cousins)        | 12.5             | 18             | -.099                     | -.523, .370 | .657            | .082         | -.379, .515 | .366            | .138         | -.329, .556 | .282            | .161          | -.308, .572 | .251            | .134              | -.333, .553 | .288            | -.432       | -.737, .025 | .969            | <b>-.003</b>          |
| <b>Twins' parents</b>                | 0                | 100            | .164                      | -.032, .348 | .050            | .139         | -.058, .325 | .083            | .047         | -.149, .240 | .319            | .149          | -.048, .334 | .068            | .044              | -.152, .238 | .329            | <b>.355</b> | .172, .515  | <b>&lt;.001</b> | <b>.150</b>           |
| <i>Twin &amp; spouse</i>             | 0                | 228            | <b>.232</b>               | .107, .351  | <b>&lt;.001</b> | .014         | -.115, .143 | .415            | .004         | -.125, .132 | .477            | -.062         | -.189, .068 | .825            | -.100             | -.176, .081 | .769            | <b>.287</b> | .164, .401  | <b>&lt;.001</b> | <b>.063</b>           |
| <i>MZ twin &amp; cotwin's spouse</i> | 0                | 109            | .130                      | -.059, .309 | .088            | -.144        | -.322, .044 | .933            | -.033        | -.219, .154 | .636            | -.129         | -.308, .060 | .910            | .118              | -.070, .299 | .108            | .262        | .079, .428  | .003            | <b>.034</b>           |
| <i>DZ twin &amp; cotwin's spouse</i> | 0                | 114            | .192                      | .009, .363  | .020            | .101         | -.083, .279 | .141            | .237         | .057, .403  | .005            | -.023         | -.205, .160 | .597            | -.006             | -.188, .178 | .523            | .120        | -.064, .296 | .101            | <b>.104</b>           |
| <i>MZ twins' spouses</i>             | 0                | 52             | .156                      | -.118, .408 | .131            | .180         | -.094, .429 | .097            | -.234        | -.473, .039 | .954            | .296          | .029, .524  | .015            | -.133             | -.388, .141 | .830            | -.002       | -.271, .268 | .506            | <b>.044</b>           |
| <i>DZ twins' spouses</i>             | 0                | 40             | .229                      | -.083, .500 | .073            | -.012        | -.317, .296 | .530            | .099         | -.214, .394 | .268            | .047          | -.262, .349 | .383            | -.224             | -.496, .163 | .921            | -.256       | -.521, .104 | .948            | <b>-.020</b>          |
| Mother & twins' spouse               | 0                | 34             | -.097                     | -.414, .243 | .711            | -.141        | -.451, .201 | .791            | .122         | -.217, .437 | .240            | -.012         | -.341, .322 | .526            | .040              | -.294, .368 | .408            | .270        | -.066, .553 | .056            | <b>.030</b>           |
| Father & twins' spouse               | 0                | 24             | -.141                     | -.504, .268 | .750            | -.065        | -.444, .338 | .620            | .082         | -.319, .461 | .346            | -.021         | -.408, .376 | .539            | .516              | .157, .756  | .004            | .439        | .058, .710  | .013            | <b>.135</b>           |
| Twin's spouse & cotwin's child       | 0                | 54             | .130                      | -.138, .382 | .170            | .139         | -.130, .389 | .154            | .241         | -.024, .476 | .037            | -.015         | -.276, .248 | .544            | -.159             | -.406, .110 | .878            | .247        | -.018, .480 | .034            | <b>.097</b>           |

Note. Dyads in boldface are part of the NTFM; dyads in italics are part of the SoTM; Bonferroni-corrected significant estimates ( $p \leq .002$ ) are shown in bold.

**Table S2.** Nuclear Twin Family Model Analyses: Fit Statistics

| Variables                                            | Fit statistics  |             |                  |                 |             |             |
|------------------------------------------------------|-----------------|-------------|------------------|-----------------|-------------|-------------|
|                                                      | -2logL          | df          | BIC*             | $\Delta$ -2logL | $\Delta$ df | $\Delta$ p  |
| <b>Honesty-Humility</b>                              |                 |             |                  |                 |             |             |
| <i>Starting model</i> ( $\delta = 0; s = 0; m = f$ ) | 7149.905        | 2575        | -1399.120        |                 |             |             |
| $d = 0$                                              | 7153.359        | 2576        | -1399.325        | 3.453           | 1           | .063        |
| $m = f = 0$                                          | 7149.905        | 2576        | -1401.052        | 0.000           | 1           | >.999       |
| $\mu = 0$                                            | 7152.425        | 2576        | -1399.792        | 2.520           | 1           | .112        |
| <b><math>d = m = f = \mu = 0</math></b>              | <b>7154.781</b> | <b>2576</b> | <b>-1402.478</b> | <b>4.876</b>    | <b>3</b>    | <b>.181</b> |
| <b>Emotionality</b>                                  |                 |             |                  |                 |             |             |
| <i>Starting model</i> ( $\delta = 0; s = 0; m = f$ ) | 7126.483        | 2581        | -1422.422        |                 |             |             |
| $d = 0$                                              | 7149.648        | 2582        | -1412.771        | 23.165          | 1           | <.001       |
| $m = f = 0$                                          | 7126.483        | 2582        | -1424.353        | 0.000           | 1           | >.999       |
| $\mu = 0$                                            | 7127.945        | 2582        | -1423.622        | 1.462           | 1           | .227        |
| <b><math>m = f = \mu = 0</math></b>                  | <b>7127.945</b> | <b>2583</b> | <b>-1425.554</b> | <b>1.462</b>    | <b>2</b>    | <b>.482</b> |
| <b>Extraversion</b>                                  |                 |             |                  |                 |             |             |
| <i>Starting model</i> ( $\delta = 0; s = 0; m = f$ ) | 7089.211        | 2581        | -1441.058        |                 |             |             |
| $d = 0$                                              | 7093.040        | 2582        | -1441.075        | 3.829           | 1           | .051        |
| $m = f = 0$                                          | 7089.220        | 2582        | -1442.985        | 0.009           | 1           | .925        |
| $\mu = 0$                                            | 7090.940        | 2582        | -1442.125        | 1.729           | 1           | .189        |
| <b><math>d = m = f = \mu = 0</math></b>              | <b>7093.221</b> | <b>2584</b> | <b>-1444.848</b> | <b>4.009</b>    | <b>3</b>    | <b>.260</b> |
| <b>Agreeableness</b>                                 |                 |             |                  |                 |             |             |
| <i>Starting model</i> ( $\delta = 0; s = 0; m = f$ ) | 7222.448        | 2580        | -1372.508        |                 |             |             |
| $d = 0$                                              | 7243.300        | 2581        | -1364.013        | 20.853          | 1           | <.001       |
| $m = f = 0$                                          | 7222.448        | 2581        | -1374.439        | 0.000           | 1           | >.999       |
| $\mu = 0$                                            | 7224.275        | 2581        | -1373.526        | 1.828           | 1           | .176        |
| <b><math>m = f = \mu = 0</math></b>                  | <b>7224.275</b> | <b>2582</b> | <b>-1375.457</b> | <b>1.828</b>    | <b>2</b>    | <b>.401</b> |
| <b>Conscientiousness</b>                             |                 |             |                  |                 |             |             |
| <i>Starting model</i> ( $\delta = 0; s = 0; m = f$ ) | 7160.013        | 2581        | -1405.657        |                 |             |             |
| $d = 0$                                              | 7173.373        | 2582        | -1400.909        | 13.359          | 1           | <.001       |
| $m = f = 0$                                          | 7160.013        | 2582        | -1407.588        | 0.000           | 1           | >.999       |
| $\mu = 0$                                            | 7160.239        | 2582        | -1407.475        | 0.226           | 1           | .634        |
| <b><math>m = f = \mu = 0</math></b>                  | <b>7160.239</b> | <b>2583</b> | <b>-1409.407</b> | <b>0.226</b>    | <b>2</b>    | <b>.893</b> |
| <b>Openness</b>                                      |                 |             |                  |                 |             |             |
| <i>Starting model</i> ( $\delta = 0; s = 0; m = f$ ) | 6990.796        | 2581        | -1490.265        |                 |             |             |
| $d = 0$                                              | 7013.261        | 2582        | -1480.965        | 22.465          | 1           | <.001       |
| <b><math>m = f = 0</math></b>                        | <b>6990.817</b> | <b>2582</b> | <b>-1492.187</b> | <b>0.020</b>    | <b>1</b>    | <b>.887</b> |
| $\mu = 0$                                            | 7002.026        | 2582        | -1486.582        | 11.229          | 1           | .001        |

Note.  $a$ : additive genetic parameter;  $e$ : nonshared environmental effects;  $d$ : nonadditive genetic effects due to emergence (perfectly correlated between MZ twins and  $\delta = 0$  for DZ twins);  $s$ : sibling-specific shared environmental effects;  $m = f$ : maternal and paternal shared environmental effects assumed to be equal;  $\mu$ : assortative mating. The best fitting model is shown in boldface.

\*Sample-size adjusted

**Table S3.** Spouses-of-Twins Model Analyses: Fit Statistics

| Variables                                                         | Fit statistics  |             |                  |                 |             |             |
|-------------------------------------------------------------------|-----------------|-------------|------------------|-----------------|-------------|-------------|
|                                                                   | -2logL          | df          | BIC*             | $\Delta$ -2logL | $\Delta$ df | $\Delta$ p  |
| <b>Honesty-Humility</b>                                           |                 |             |                  |                 |             |             |
| <i>Starting full ADE model</i> ( $a, d, e, \mu, u, \& v \neq 0$ ) | 7502.476        | 2707        | -1480.183        |                 |             |             |
| $\mu = 0$                                                         | 7502.476        | 2708        | -1482.116        | 0.000           | 1           | >.999       |
| $u = 0$                                                           | 7508.646        | 2708        | -1479.030        | 6.170           | 1           | .013        |
| $v = 0$                                                           | 7503.830        | 2708        | -1481.439        | 1.354           | 1           | .245        |
| <b><math>\mu = v = 0</math></b>                                   | <b>7505.165</b> | <b>2709</b> | <b>-1482.704</b> | <b>2.688</b>    | <b>2</b>    | <b>.261</b> |
| <b>Openness</b>                                                   |                 |             |                  |                 |             |             |
| <i>Starting full ADE model</i> ( $a, d, e, \mu, u, \& v \neq 0$ ) | 7370.553        | 2713        | -1557.740        |                 |             |             |
| $\mu = 0$                                                         | 7373.915        | 2714        | -1557.992        | 3.362           | 1           | .067        |
| $u = 0$                                                           | 7370.565        | 2714        | -1559.667        | 0.012           | 1           | .914        |
| $v = 0$                                                           | 7370.570        | 2714        | -1559.664        | 0.017           | 1           | .898        |
| <b><math>u = v = 0</math></b>                                     | <b>7370.571</b> | <b>2715</b> | <b>-1561.596</b> | <b>0.018</b>    | <b>2</b>    | <b>.991</b> |
| $\mu = u = v = 0$                                                 | 7406.474        | 2716        | -1545.577        | 35.921          | 3           | <.001       |

Note.  $a$ : additive genetic parameter;  $d$ : nonadditive genetic effects due to emergence (perfectly correlated between MZ twins and  $\delta = 0$  for DZ twins);  $e$ : nonshared environmental effects;  $\mu$ : phenotypic assortment;  $u$ : social homogamy;  $v$ : spouse-specific interaction effects.

\*Sample-size adjusted

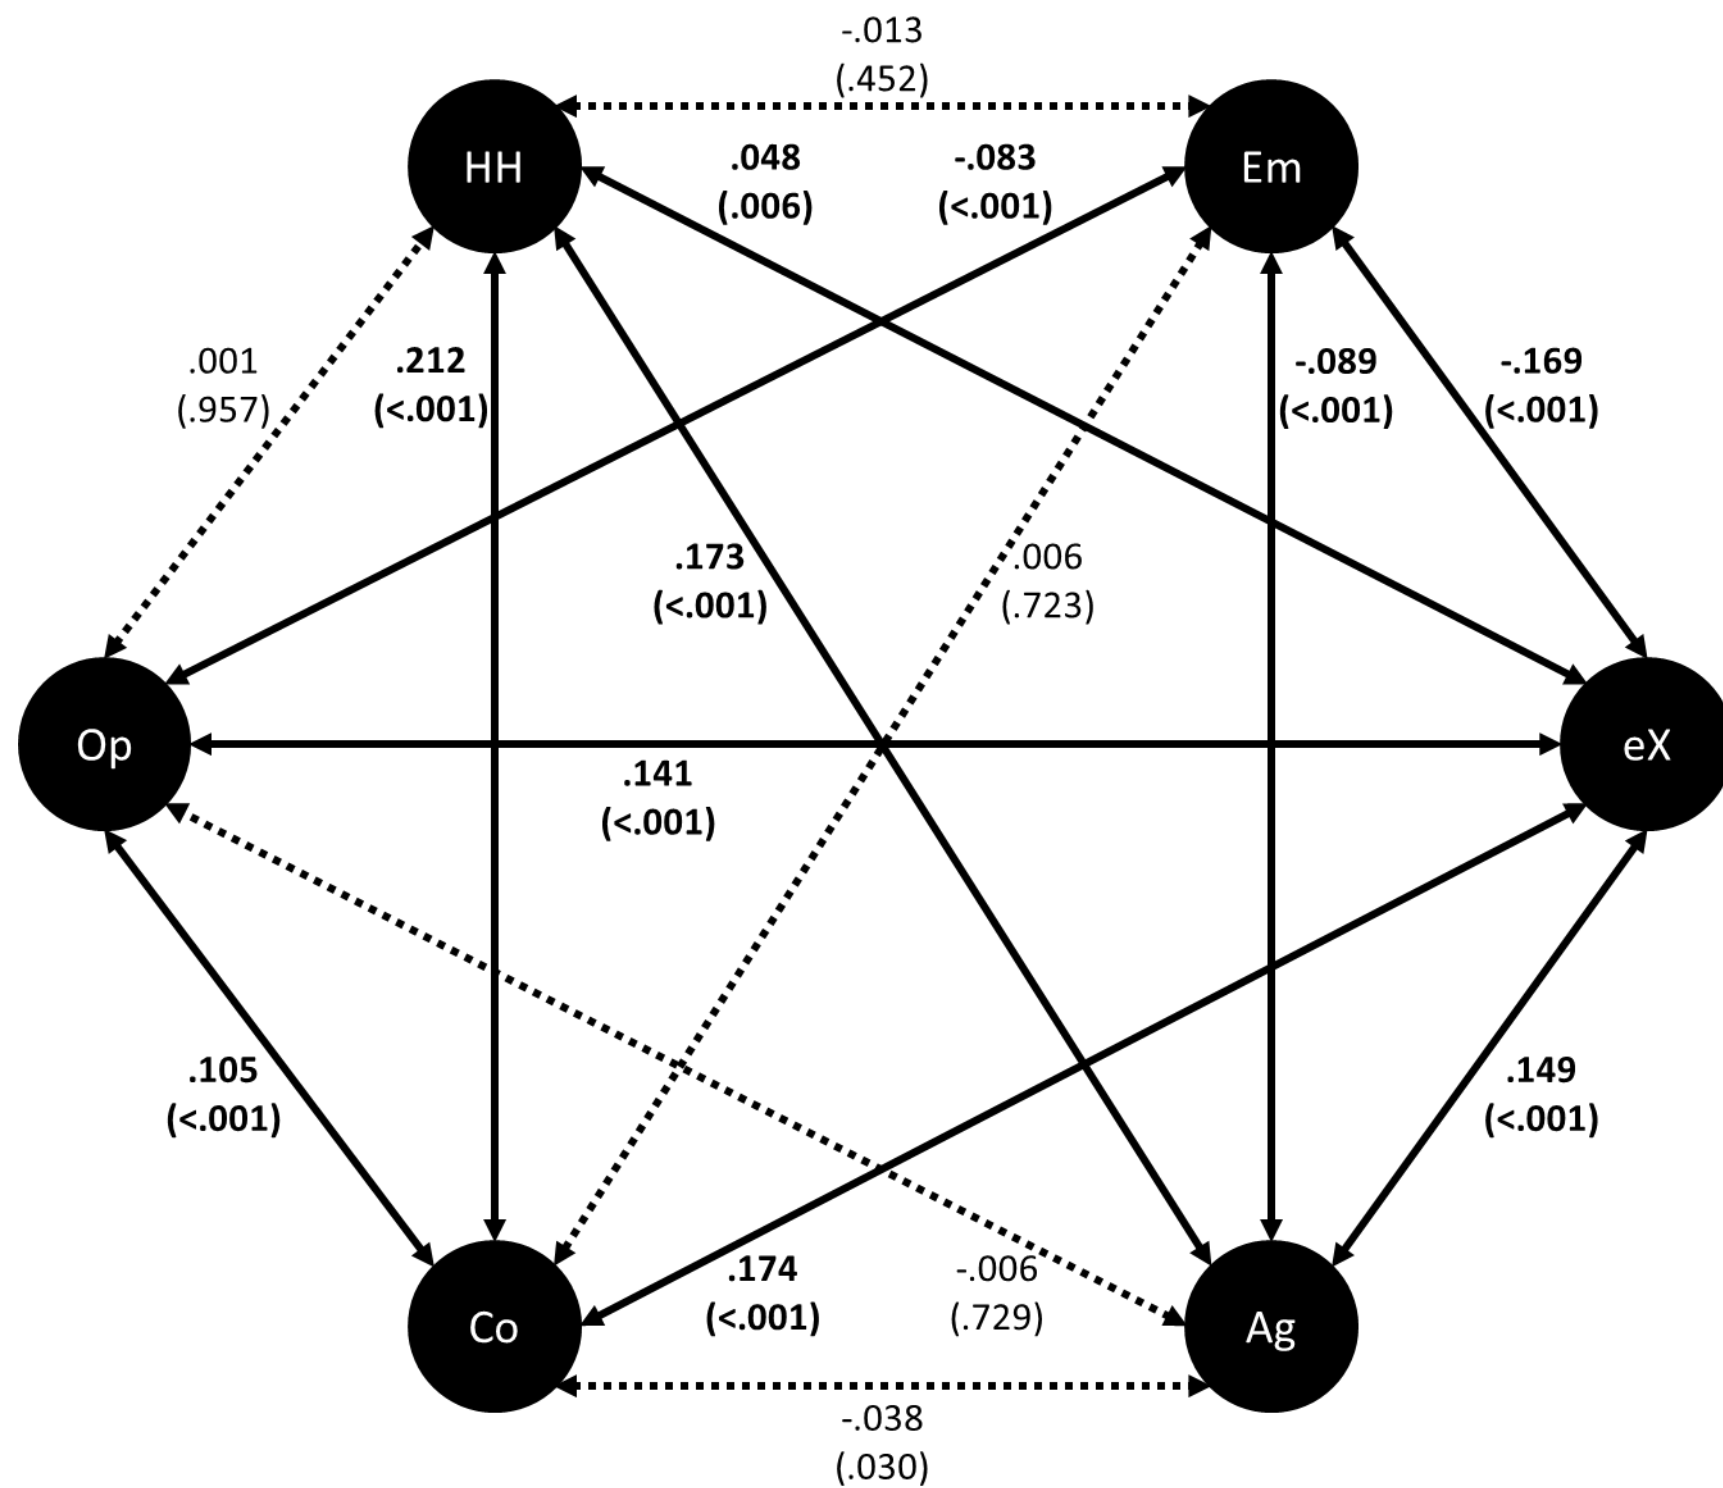

**Figure S1: Robust correlation estimates for HEXACO personality traits.** HH: Honesty-Humility; Em: Emotionality; eX: Extraversion; Ag: Agreeableness; Co: Conscientiousness; Op: Openness. The correlations are based on an 8-group structural equation model (twin a, twin b, mothers, fathers, twin a's spouse, twin b's spouse, twin a's child, and twin b's child). The correlations could be constrained to be equal across groups without significant reduction of model fit ( $\Delta-2\log L = 89.12$ ;  $\Delta df = 105$ ;  $\Delta p = .866$ ). Exact  $p$ -values are shown in parentheses. Statistically significant correlations ( $p < .01$ ) are shown in bold and with solid double-headed arrows.
